# Supplementary material for: Small-molecule MDM2 antagonists attenuate the senescence-associated secretory phenotype
Source: PubMed Central journal article supplement (PMC5799282; doi:10.1038/s41598-018-20000-4), 2018-02-05
Supplement: 41598_2018_20000_MOESM1_ESM.pdf [file 41598_2018_20000_MOESM1_ESM.pdf]

## **Small-molecule MDM2 antagonists attenuate the senescence-associated secretory phenotype**

Christopher D. Wiley, Nicholas Schaum, Fatouma Alimirah, Jose Alberto Lopez-Dominguez, Arturo V. Orjalo, Gary Scott, Pierre-Yves Desprez, Christopher Benz, Albert R. Davalos, and Judith Campisi

### **SUPPLEMENTARY FIGURE LEGENDS**

**Figure S1.** (A-B) IMR-90 human fibroblasts were treated with DMSO, MI-63 or nutlin-3a for 48 h, or 1  $\mu$ M Staurosporine for 4 h, and immunostained for cleaved caspase-3. (A), representative images. (B), percentage of cleaved caspase-3-positive cells. Data are representative of two independent experiments. \*\* =  $p < 0.01$ , 1-way ANOVA.

**Figure S2.** (A) IMR-90 human fibroblasts were immunostained for HMGB1 (red) and p53 (green) following a 24 or 72 h treatment with MI-63. (B) CM from treated cells was analyzed for HMGB1 by ELISA. Data are representative of two independent experiments. \*\* =  $p < 0.05$ , 1-way ANOVA.

**Figure S3.** (A-B) Human mammary epithelial MCF10A (A) and 184A1a (B) cells were induced to senesce by ionizing radiation (IR), and treated with either rapamycin (RAPA) or MI-63. (C) IMR-90 human fibroblasts induced to senesce by IR were cultured with DMSO, or continuously with 10  $\mu$ M MI-63 for 1, 5 or 6 d after irradiation. ELISA was

used to measure IL-6 secretion. (D) HCA2 fibroblasts were irradiated and DMSO or nutlin-3a was added either immediately (IR-7D), or after 7 days (IR-14D). CM was collected 7 d later and analyzed for IL-6 by ELISA. (E-F) IMR-90 fibroblasts were treated with DMSO, 10  $\mu$ M nutlin-3a (Nutlin), 250 nM doxorubicin (DOXO), 4  $\mu$ M cisplatin (CIS) or 20 nM taxol (TAX) for 24 h. Cells were cultured in drug-free media for 6 d, stained with anti- $\gamma$ -H2AX antibody (green) (E), and cells with >3 foci were quantified (F). (G) IMR-90 cells were induced to senesce upon RAS overexpression. Cells were cultured with DMSO or MI-63 for 72 h and IL-6 levels measured by ELISA. (H) IL-6 secretion was determined in WI-38 human fibroblasts induced to senesce upon replicative exhaustion and treated with DMSO or MI-63. Data are representative of two independent experiments. \*\* =  $p < 0.01$ , \*\*\* =  $p < 0.001$ , 1-way ANOVA.

**Table S1.** IMR-90 human fibroblasts were induced to senesce by ionizing radiation (IR) or doxorubicin. Cells cultured in DMSO or MI-63 were analyzed by multiplex ELISA for the indicated proteins. Shown is the straight fold-increase upon IR or doxorubicin treatment.

S1

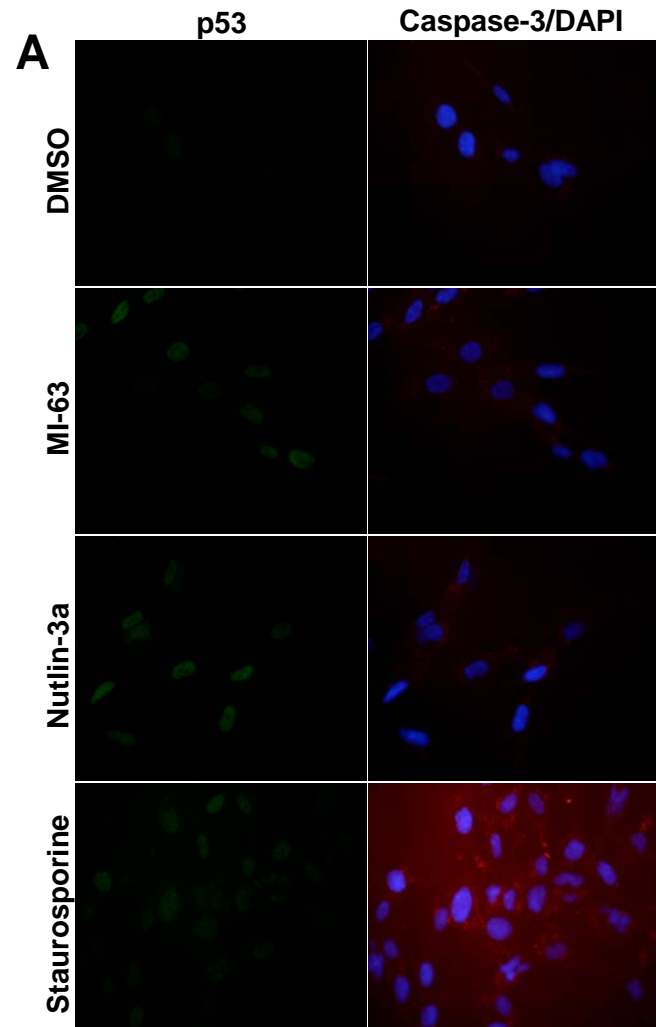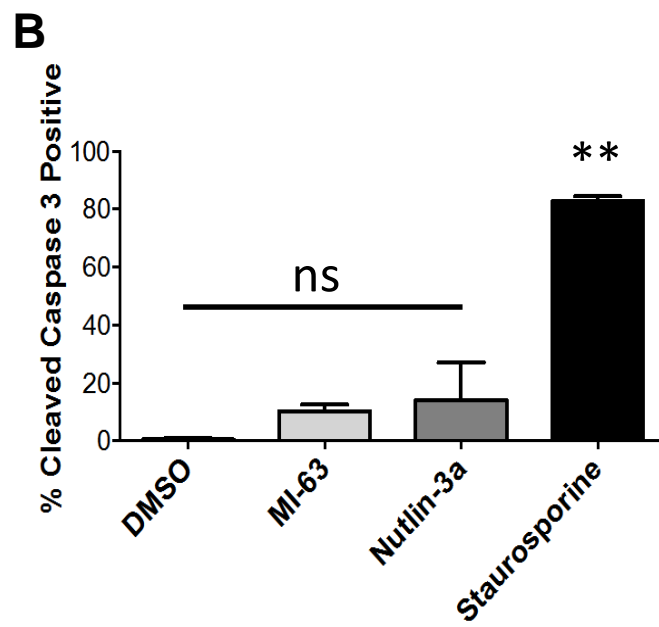

# S2

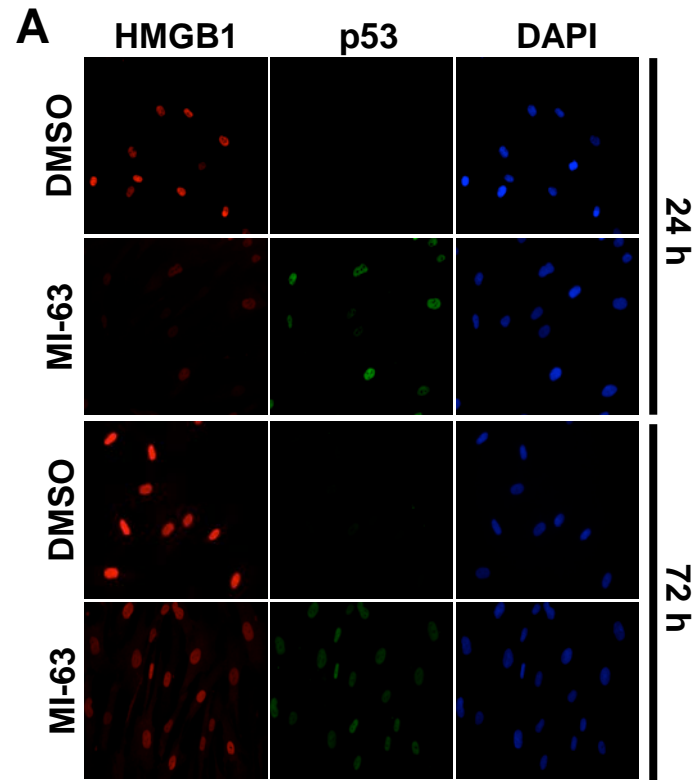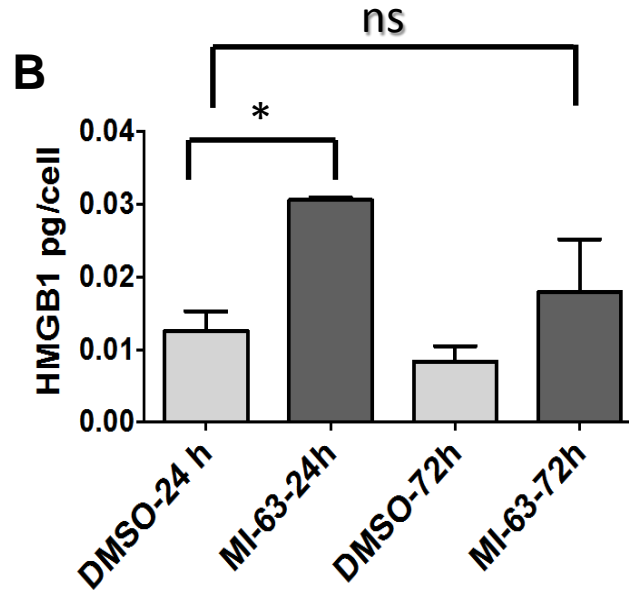

**S3**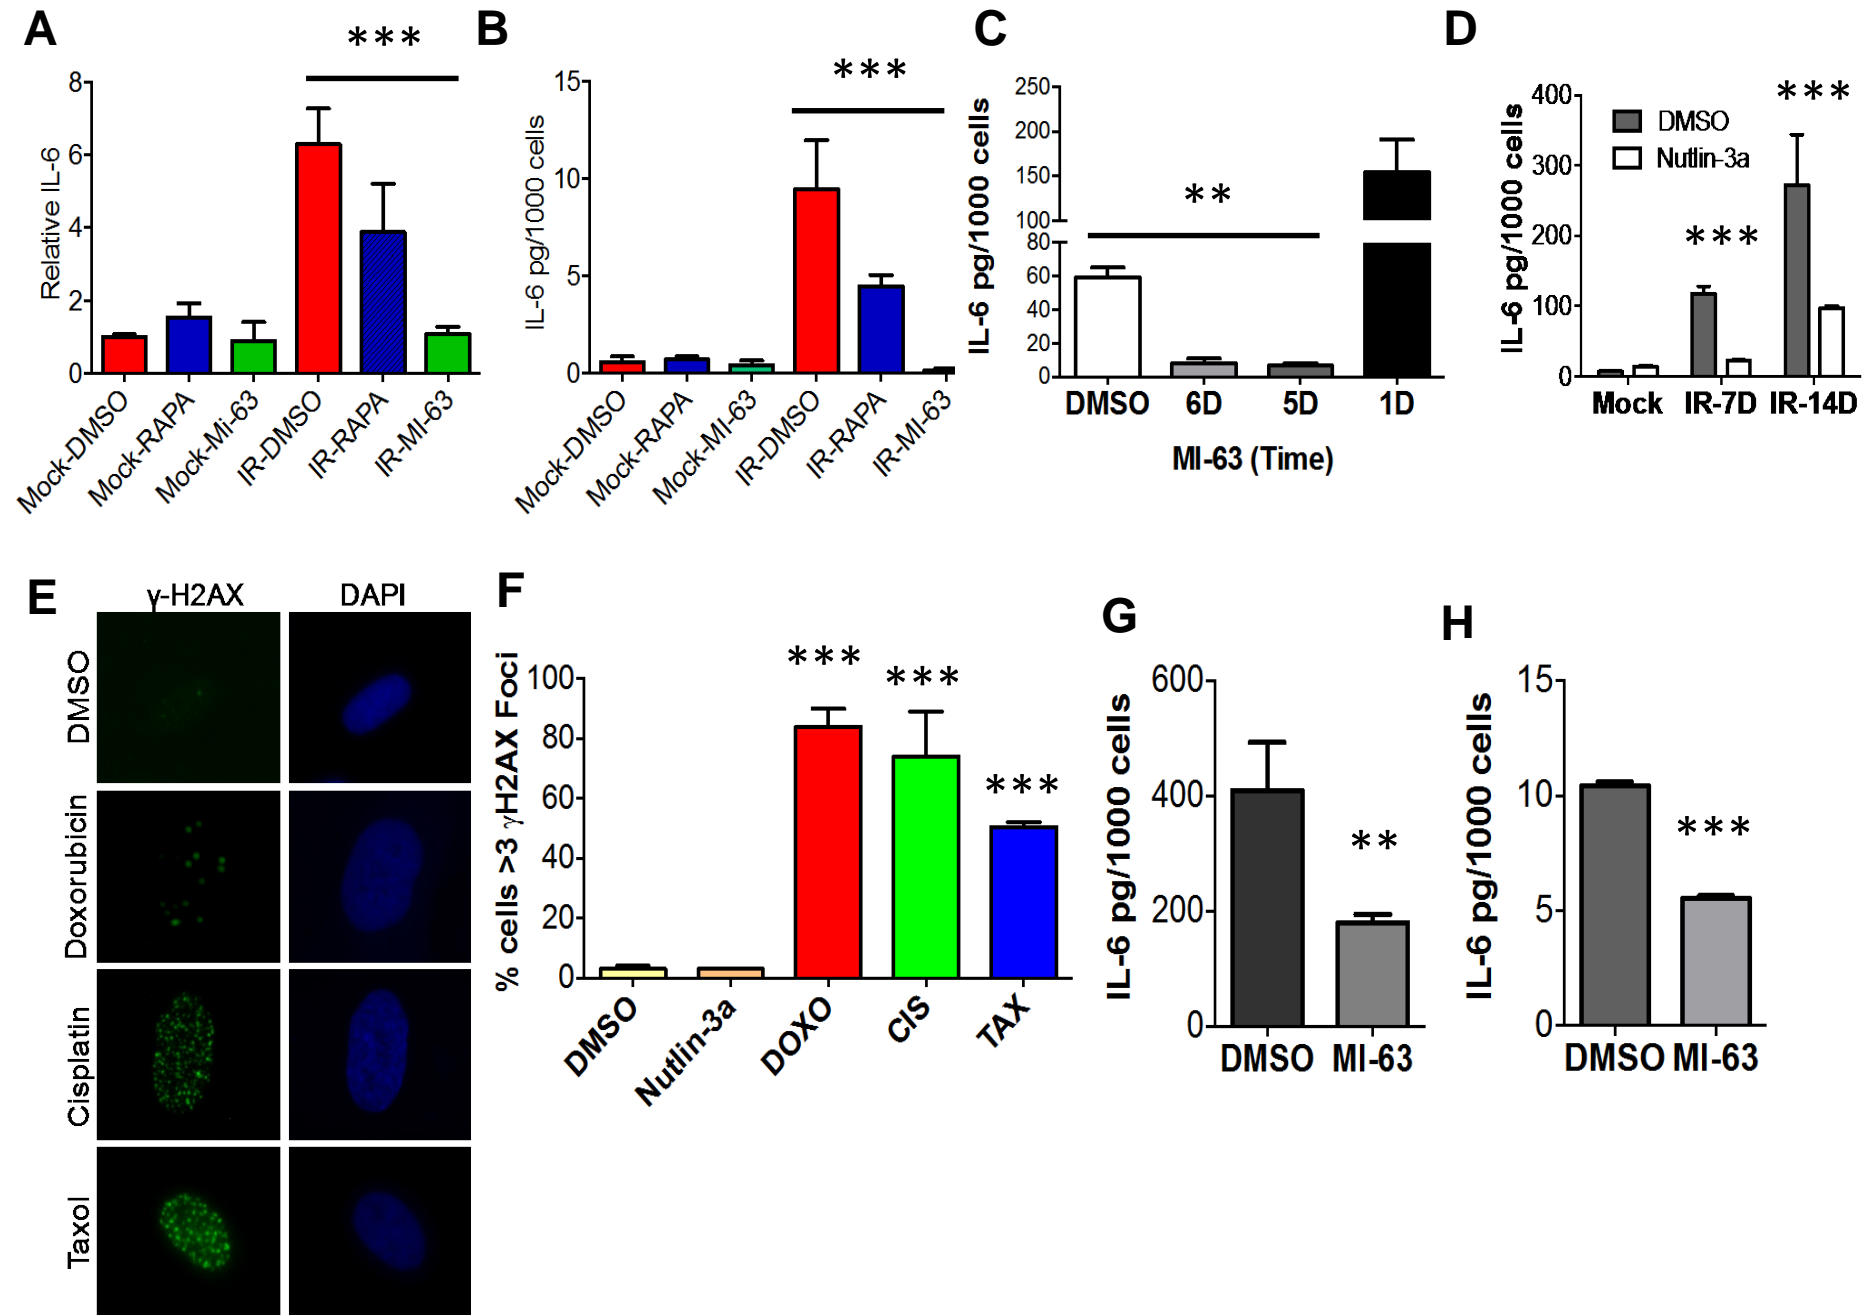

**Table S1**

|         | Mock |       | Doxorubicin |       | IR    |       |
|---------|------|-------|-------------|-------|-------|-------|
|         | DMSO | MI-63 | DMSO        | MI-63 | DMSO  | MI-63 |
| IL6     | 1.0  | 1.0   | 174.2       | 1.0   | 242.6 | 1.0   |
| IP10    | 1.0  | 1.0   | 62.2        | 1.0   | 50.8  | 1.0   |
| VCAM1   | 1.0  | 1.0   | 48.3        | 1.0   | 24.8  | 1.0   |
| IL7     | 1.0  | 0.5   | 25.6        | 0.5   | 25.3  | 0.5   |
| LIF     | 1.0  | 0.7   | 13.7        | 0.5   | 10.3  | 1.5   |
| ICAM1   | 1.0  | 0.4   | 12.4        | 0.4   | 7.1   | 0.4   |
| HGF     | 1.0  | 1.0   | 11.1        | 0.5   | 4.0   | 0.9   |
| TRAIL   | 1.0  | 1.0   | 12.5        | 1.0   | 2.5   | 1.0   |
| MCP1    | 1.0  | 0.7   | 7.6         | 0.2   | 4.8   | 0.6   |
| EOTAXIN | 1.0  | 0.4   | 7.1         | 0.3   | 4.4   | 0.2   |
| VEGF    | 1.0  | 0.5   | 5.9         | 0.2   | 4.8   | 0.6   |
| IL8     | 1.0  | 0.1   | 4.8         | 0.2   | 6.7   | 0.0   |
| RANTES  | 1.0  | 1.0   | 5.0         | 1.0   | 3.6   | 1.0   |
| GMCSF   | 1.0  | 0.8   | 3.8         | 0.3   | 3.2   | 0.3   |
| IL12P70 | 1.0  | 0.5   | 2.7         | 0.3   | 2.1   | 0.3   |
| IL5     | 1.0  | 0.4   | 2.3         | 0.2   | 1.7   | 0.2   |
